# Supplementary material
Source: publisher figshare collection journal article supplement (https://acs.figshare.com/ndownloader/files/21743538)
Supplement: Supplementary file 1 [file 21743538]

## Sheet: Feuil1
2Se-1				2Se-2				2Se-3				2Se-4				3Se-1				3Se-2				3Se-3				3Se-4				2As-1				2As-2				2As-3				2As-4				3As-1
FE	-0.000886784	-0.000275081	-0.00086926	FE	-0.0491208	-0.00929451	0.00828328	FE	-0.0536617	-0.00224298	-0.0330481	FE	-0.030187	-0.0199556	0.0507791	FE	0.0298039	0.00680705	-0.00915973	FE	-0.0630993	0.0319605	0.0186982	FE	-0.0456929	-0.0452371	-0.0443439	FE	-0.0632154	0.0387245	-0.0209621	FE	-0.0532711	0.0611281	0.0255119	FE	-0.0772842	-0.00403277	0.0197891	FE	-0.00590276	0.0266355	0.0127852	FE	-0.172338	-0.0591089	0.00946688	FE	0.0346902
FE	-0.002315	-0.00294245	5.48115	FE	-0.0061385	0.00180092	5.48599	FE	-0.00366849	0.000868395	5.48876	FE	0.00156077	-0.00194508	5.47415	FE	-0.00280282	0.000510226	5.4842	FE	-0.00902689	0.00432675	5.48515	FE	-0.00272161	-0.00187011	5.49021	FE	-0.00708288	0.00456088	5.48764	FE	-0.00332117	0.00293301	5.52898	FE	-0.0035867	0.0143677	5.51748	FE	-0.00775528	-0.0022736	5.54747	FE	-0.00405101	-0.00458342	5.50824	FE	-0.00473441
FE	-0.00369225	5.48034	-0.00369529	FE	-0.00387515	5.4809	0.00429444	FE	-0.00169653	5.48263	0.000949955	FE	-0.00011491	5.48354	0.00325788	FE	-0.00931371	5.51996	0.0119463	FE	-0.00955174	5.47304	0.00712177	FE	-0.00143012	5.48915	-0.000602561	FE	-0.00619735	5.47519	0.00408786	FE	0.0122258	5.60939	-0.00819078	FE	-0.0124819	5.53964	0.0183002	FE	-0.000496942	5.53456	0.000373851	FE	-0.00921488	5.52977	-0.00385013	FE	-0.0242637
FE	-0.00497954	5.47907	5.4797	FE	-0.000954655	5.4833	5.4849	FE	0.00172023	5.47673	5.48609	FE	0.00293023	5.48545	5.48018	FE	-0.00306393	5.48752	5.48131	FE	-0.00160807	5.48009	5.48263	FE	0.000264322	5.47959	5.48979	FE	0.000288523	5.47471	5.48387	FE	-0.00158288	5.5203	5.52392	FE	-0.00926079	5.5553	5.52783	FE	-0.00632786	5.52285	5.5368	FE	-0.010918	5.53695	5.51808	FE	-0.00257079
FE	5.48112	-0.00295986	-0.00229404	FE	5.53133	0.0114053	-0.0105001	FE	5.4902	0.00155184	-0.00143559	FE	5.48867	-0.00274015	0.00493223	FE	5.5338	0.00942518	-0.00834548	FE	5.53908	0.0106546	-0.00778504	FE	5.49966	-0.000664883	0.00133979	FE	5.49996	0.000490159	0.002303	FE	5.53286	-0.00632629	0.00475213	FE	5.61475	0.00341857	-0.0273308	FE	5.54323	-0.0093205	-0.00620152	FE	5.50941	-0.00109451	-0.00978779	FE	5.5828
FE	5.47825	-0.00579401	5.47829	FE	5.48428	0.00424343	5.4764	FE	5.48757	0.00138229	5.48029	FE	5.48248	0.00160586	5.47515	FE	5.48399	0.00283818	5.48151	FE	5.48758	0.00307024	5.47756	FE	5.49344	0.00179093	5.47989	FE	5.49189	0.00194301	5.48075	FE	5.53174	-0.00324864	5.53627	FE	5.52594	0.013425	5.4982	FE	5.52934	-0.00999009	5.52312	FE	5.52096	0.00060131	5.50589	FE	5.53266
FE	5.47966	5.47907	-0.00496574	FE	5.49008	5.48549	-0.002242	FE	5.48579	5.48778	1.27372e-05	FE	5.48781	5.48541	-6.41526e-05	FE	5.48962	5.48261	-1.1755e-05	FE	5.49659	5.4825	-3.60632e-05	FE	5.4878	5.48824	0.00192245	FE	5.49279	5.48496	0.00269097	FE	5.54027	5.50713	0.0089618	FE	5.54861	5.54007	0.00258953	FE	5.53076	5.53188	-0.00320905	FE	5.52302	5.53768	-0.0176566	FE	5.53822
FE	5.47702	5.47761	5.47704	FE	5.48319	5.48715	5.48155	FE	5.48505	5.4844	5.48341	FE	5.48537	5.48358	5.48159	FE	5.48192	5.48581	5.48242	FE	5.48442	5.48546	5.48235	FE	5.48644	5.48539	5.48493	FE	5.48596	5.4842	5.48484	FE	5.53155	5.51507	5.53594	FE	5.5303	5.55284	5.51627	FE	5.52247	5.52314	5.52803	FE	5.51329	5.53303	5.51149	FE	5.52995
FE	-2.74277	-0.00555478	-2.74334	FE	-2.73891	-0.00422155	-2.74585	FE	-2.74515	-0.0027199	-2.74812	FE	-2.78573	-0.014824	-2.75406	FE	-5.491	0.00117248	-0.00117592	FE	-5.48386	-0.000134063	0.000241148	FE	-5.49074	-0.000388088	-0.00399114	FE	-5.48937	0.000326648	-0.00304839	FE	-2.77574	0.00911414	-2.76795	FE	-2.75042	-0.010182	-2.76059	FE	-2.76189	0.00550734	-2.7651	FE	-2.78686	-0.0308107	-2.69528	FE	-5.54789
FE	-2.74148	-0.00154966	2.7441	FE	-2.74331	0.00220176	2.74792	FE	-2.75082	0.00164343	2.7452	FE	-2.74462	-0.00163452	2.74378	FE	-5.48767	0.00152151	5.48674	FE	-5.48395	0.0014445	5.48249	FE	-5.48328	-0.000751358	5.48153	FE	-5.4845	-0.00105096	5.48245	FE	-2.77519	0.00970894	2.77021	FE	-2.78695	0.0108182	2.76816	FE	-2.79814	0.00567397	2.77999	FE	-2.79349	-0.0109623	2.80656	FE	-5.53954
FE	-2.75175	5.52517	-2.75337	FE	-2.73715	5.47952	-2.739	FE	-2.73919	5.47935	-2.74024	FE	-2.74142	5.48083	-2.7431	FE	-5.48665	5.47922	0.00260927	FE	-5.48217	5.48069	0.00204435	FE	-5.48907	5.48364	-0.00138213	FE	-5.48347	5.47992	-0.000634332	FE	-2.77804	5.52411	-2.7715	FE	-2.76099	5.52982	-2.7401	FE	-2.76154	5.53326	-2.76028	FE	-2.74941	5.53205	-2.75504	FE	-5.53911
FE	-2.74201	5.48201	2.74072	FE	-2.74098	5.48285	2.74511	FE	-2.74173	5.47752	2.7419	FE	-2.73879	5.47954	2.7406	FE	-5.4849	5.48356	5.48436	FE	-5.48289	5.48305	5.48406	FE	-5.48157	5.4821	5.48191	FE	-5.48167	5.48054	5.48187	FE	-2.76691	5.52744	2.76258	FE	-2.77763	5.55114	2.77612	FE	-2.77331	5.52445	2.76891	FE	-2.77492	5.52616	2.77713	FE	-5.53305
FE	2.74412	8.19001e-06	-2.74132	FE	2.7514	-0.00832119	-2.79118	FE	2.75372	-0.00752449	-2.7835	FE	2.75964	-0.0102703	-2.78326	FE	-2.74774	-0.00156774	-2.75058	FE	-2.74988	-0.00374378	-2.74414	FE	-2.7504	-0.00276977	-2.74977	FE	-2.75216	-0.00232348	-2.74854	FE	2.75778	0.000982367	-2.75762	FE	2.83013	-0.0828949	-2.73576	FE	2.77982	-0.0115669	-2.82772	FE	2.8356	-0.012108	-2.85674	FE	-2.78202
FE	2.73022	0.0389525	2.72858	FE	2.73078	0.0103315	2.78916	FE	2.78471	0.0107405	2.7571	FE	2.74696	-0.00112106	2.75293	FE	-2.75735	0.0105109	2.78432	FE	-2.75166	0.00205347	2.7455	FE	-2.75632	0.00331112	2.74242	FE	-2.75981	0.00348409	2.74491	FE	2.76517	-0.00191966	2.76995	FE	2.70726	0.0822678	2.72829	FE	2.84365	0.0131243	2.76556	FE	2.74556	-0.000851211	2.75796	FE	-2.77761
FE	2.74058	5.48044	-2.74207	FE	2.74434	5.47841	-2.74422	FE	2.74351	5.48404	-2.74082	FE	2.74637	5.48616	-2.74172	FE	-2.74397	5.47645	-2.74255	FE	-2.74321	5.47819	-2.74037	FE	-2.74472	5.48018	-2.74173	FE	-2.74437	5.47789	-2.74229	FE	2.76491	5.51882	-2.76715	FE	2.77057	5.51274	-2.75452	FE	2.76673	5.52863	-2.76919	FE	2.78233	5.54473	-2.78351	FE	-2.7696
FE	2.73524	5.47235	2.73468	FE	2.74192	5.48801	2.74626	FE	2.74644	5.4857	2.74601	FE	2.74492	5.48728	2.74361	FE	-2.74496	5.48427	2.74544	FE	-2.74426	5.4821	2.74421	FE	-2.74621	5.47911	2.74202	FE	-2.74622	5.47757	2.74144	FE	2.77159	5.51194	2.76808	FE	2.76555	5.56696	2.77542	FE	2.76382	5.53185	2.76661	FE	2.75181	5.53654	2.75034	FE	-2.76892
FE	-2.73795	-2.73939	0.000501647	FE	-2.74584	-2.74627	-0.000225171	FE	-2.74826	-2.74503	-0.00030012	FE	-2.74705	-2.74717	0.000430704	FE	2.74492	-0.000147036	-2.75081	FE	2.749	-0.0103444	-2.78755	FE	2.75739	-0.01017	-2.78364	FE	2.75342	-0.00986823	-2.78029	FE	-2.79525	-2.74371	0.000525308	FE	-2.76996	-2.77778	-0.00631757	FE	-2.75509	-2.76496	0.00532092	FE	-2.7837	-2.78429	0.0303562	FE	2.76339
FE	-2.7413	-2.73993	5.48406	FE	-2.74477	-2.74107	5.4813	FE	-2.74293	-2.74487	5.4827	FE	-2.7433	-2.74408	5.47999	FE	2.73502	0.0112391	2.78549	FE	2.73247	0.00978983	2.79089	FE	2.78955	0.00996333	2.75844	FE	2.78708	0.0110857	2.75945	FE	-2.7681	-2.75453	5.52922	FE	-2.77492	-2.75591	5.50407	FE	-2.76361	-2.77056	5.54233	FE	-2.77507	-2.77344	5.55127	FE	2.75976
FE	-2.75336	2.7323	0.0409528	FE	-2.73634	2.74423	0.00224122	FE	-2.74157	2.74263	-0.00118592	FE	-2.73905	2.73939	-0.000992669	FE	2.74145	5.47644	-2.74144	FE	2.74355	5.47617	-2.74318	FE	2.7439	5.48327	-2.73902	FE	2.74389	5.48165	-2.73973	FE	-2.78374	2.76706	-0.00128158	FE	-2.76743	2.77842	0.0138737	FE	-2.76885	2.76959	0.000187499	FE	-2.77573	2.76332	0.0199589	FE	2.76476
FE	-2.74748	2.73728	5.47433	FE	-2.74146	2.74308	5.4851	FE	-2.73876	2.73985	5.48271	FE	-2.73886	2.74051	5.48029	FE	2.74181	5.48443	2.74553	FE	2.7438	5.48605	2.74846	FE	2.74846	5.48639	2.74912	FE	2.74863	5.4852	2.74877	FE	-2.77397	2.76546	5.52297	FE	-2.77754	2.78498	5.52668	FE	-2.7711	2.76505	5.53584	FE	-2.77006	2.76137	5.54934	FE	2.7682
FE	2.73863	-2.74475	-0.0076346	FE	2.73187	-2.78925	-0.0113982	FE	2.73985	-2.74543	0.00410456	FE	2.74284	-2.74914	0.00463778	FE	8.22744	-0.00112317	-2.74514	FE	8.23126	0.000351336	-2.74587	FE	8.22511	0.000529144	-2.74188	FE	8.22455	0.000230069	-2.74119	FE	2.84157	-2.77893	0.0311315	FE	2.76596	-2.86315	-0.0499727	FE	2.77937	-2.77842	0.00222701	FE	2.75103	-2.778	-0.00683761	FE	8.29747
FE	2.7285	-2.7539	5.52311	FE	2.73579	-2.74396	5.4789	FE	2.74005	-2.74343	5.4811	FE	2.74014	-2.74261	5.47935	FE	8.22518	0.00403854	2.74356	FE	8.22936	0.00522509	2.7427	FE	8.22861	0.00269052	2.74226	FE	8.22814	0.00257436	2.74288	FE	2.77326	-2.76054	5.53387	FE	2.75984	-2.75292	5.48486	FE	2.76663	-2.77403	5.52262	FE	2.74973	-2.77238	5.5071	FE	8.297
FE	2.74076	2.74208	-0.00210327	FE	2.75035	2.79126	0.0093506	FE	2.75165	2.78575	0.0114666	FE	2.75345	2.78397	0.0121425	FE	8.22409	5.48247	-2.74123	FE	8.22685	5.48223	-2.7415	FE	8.22311	5.4835	-2.73998	FE	8.22437	5.48171	-2.73918	FE	2.80855	2.75103	0.014582	FE	2.77141	2.86253	0.0424072	FE	2.75894	2.81117	0.00859382	FE	2.73806	2.81529	-0.00399756	FE	8.29334
FE	2.73996	2.73848	5.47836	FE	2.74236	2.75002	5.48344	FE	2.74593	2.74598	5.48201	FE	2.74606	2.74694	5.48	FE	8.22243	5.48586	2.74218	FE	8.22547	5.48567	2.74214	FE	8.22436	5.48558	2.74288	FE	8.22559	5.48404	2.74367	FE	2.76581	2.75814	5.53481	FE	2.76247	2.78073	5.53079	FE	2.75926	2.76395	5.52291	FE	2.75529	2.77524	5.50227	FE	8.29326
FE	0.00206346	-2.73925	-2.73787	FE	-0.00229397	-2.74615	-2.74311	FE	-0.00394514	-2.74608	-2.74244	FE	-0.000422235	-2.75019	-2.74349	FE	-2.7572	-2.78123	-0.0122469	FE	-2.76109	-2.74757	0.00284912	FE	-2.75382	-2.74575	-0.00252917	FE	-2.7611	-2.74707	0.0013556	FE	-0.0253924	-2.76123	-2.80339	FE	0.00602697	-2.78411	-2.7644	FE	0.0121746	-2.75764	-2.7594	FE	0.0161336	-2.77697	-2.76723	FE	-2.74942
FE	-0.00764755	-2.74543	2.73929	FE	-0.00607567	-2.74102	2.74234	FE	-0.0116934	-2.78367	2.75388	FE	-0.00273178	-2.74462	2.74519	FE	-2.74676	-2.74208	5.48273	FE	-2.7482	-2.741	5.47697	FE	-2.74395	-2.74315	5.48092	FE	-2.74783	-2.74401	5.47718	FE	0.00135774	-2.75331	2.79317	FE	-0.00970681	-2.75721	2.74599	FE	0.00286802	-2.81104	2.79631	FE	-0.0174811	-2.77175	2.75981	FE	-2.7668
FE	0.0410518	2.73068	-2.75179	FE	0.0033922	2.73865	-2.7387	FE	0.00267003	2.74198	-2.74207	FE	0.0117238	2.7813	-2.75071	FE	-2.75528	2.74622	0.00149343	FE	-2.74828	2.74497	0.00267328	FE	-2.78885	2.75328	-0.0100878	FE	-2.74951	2.74476	-0.00123407	FE	-0.0244029	2.76866	-2.81114	FE	0.00642009	2.75611	-2.73456	FE	0.00435098	2.77072	-2.7624	FE	0.0512419	2.82884	-2.79506	FE	-2.79865
FE	-0.00361026	2.74199	2.74055	FE	-0.00104095	2.7444	2.7461	FE	-0.000842558	2.74914	2.74555	FE	0.0031876	2.7447	2.74439	FE	-2.74651	2.74541	5.4819	FE	-2.74369	2.74303	5.48472	FE	-2.74363	2.74103	5.4826	FE	-2.74279	2.74087	5.48226	FE	-0.00538837	2.76111	2.77507	FE	-0.0178133	2.79321	2.7758	FE	-0.00970647	2.78164	2.76589	FE	-0.0173932	2.7605	2.75554	FE	-2.77543
FE	5.4825	-2.74	-2.74145	FE	5.48323	-2.74241	-2.74817	FE	5.48062	-2.74038	-2.7421	FE	5.47768	-2.74357	-2.74319	FE	2.73749	-2.78179	-0.0117463	FE	2.77494	-2.80098	-0.00151117	FE	2.74593	-2.7489	0.00483127	FE	2.78316	-2.75668	0.0132332	FE	5.53673	-2.76699	-2.76463	FE	5.55514	-2.79387	-2.78335	FE	5.5366	-2.76867	-2.76801	FE	5.53828	-2.76595	-2.77779	FE	2.75963
FE	5.52306	-2.75552	2.73028	FE	5.47876	-2.73661	2.73666	FE	5.4814	-2.74012	2.74169	FE	5.48197	-2.74012	2.74145	FE	2.73814	-2.74209	5.48237	FE	2.73984	-2.74505	5.47937	FE	2.74352	-2.7436	5.48144	FE	2.74442	-2.74329	5.48075	FE	5.5423	-2.76566	2.77808	FE	5.53095	-2.75677	2.72699	FE	5.53451	-2.77424	2.76435	FE	5.50676	-2.76989	2.75332	FE	2.76638
FE	5.47439	2.73662	-2.7468	FE	5.48822	2.74305	-2.74444	FE	5.48444	2.74415	-2.74186	FE	5.48453	2.74431	-2.74225	FE	2.78839	2.73989	0.00630384	FE	2.75344	2.79217	0.0123804	FE	2.76346	2.7871	0.0103336	FE	2.75637	2.78755	0.0147324	FE	5.52888	2.75518	-2.76459	FE	5.54707	2.75659	-2.75357	FE	5.52538	2.76175	-2.76792	FE	5.54054	2.7713	-2.77751	FE	2.83269
FE	5.47999	2.73862	2.73997	FE	5.48446	2.74817	2.74104	FE	5.48858	2.74774	2.74238	FE	5.48615	2.74476	2.7414	FE	2.74327	2.74634	5.48464	FE	2.74321	2.74831	5.48514	FE	2.75046	2.74614	5.48754	FE	2.7469	2.74558	5.48414	FE	5.53712	2.75294	2.77391	FE	5.53132	2.78347	2.75683	FE	5.52074	2.76004	2.75863	FE	5.50845	2.76658	2.74769	FE	2.76487
S	2.11289	2.13529	2.11278	S	2.12476	2.13166	2.12805	S	2.13505	2.13184	2.12659	S	2.12794	2.13005	2.12331	FE	8.22383	-2.74176	-0.00268726	FE	8.22971	-2.74075	-0.00426102	FE	8.22297	-2.73943	-0.000230601	FE	8.22621	-2.74	-0.000429379	S	2.1427	2.14137	2.14137	S	2.12647	2.22649	2.16302	S	2.14623	2.14775	2.12218	S	2.12941	2.1495	2.11392	FE	8.29868
S	2.13736	2.11487	-3.36917	S	2.12782	2.12451	-3.37633	S	2.12531	2.12276	-3.37232	S	2.12626	2.12882	-3.37147	FE	8.2201	-2.73815	5.47925	FE	8.22312	-2.73791	5.47882	FE	8.22466	-2.73909	5.48206	FE	8.22398	-2.73967	5.48273	S	2.12943	2.1453	-3.3873	S	2.16124	2.10788	-3.32735	S	2.15079	2.14282	-3.40564	S	2.18434	2.16761	-3.43283	FE	8.29461
S	2.08576	-3.39835	2.08571	S	2.11285	-3.36861	2.11903	S	2.11882	-3.37169	2.12581	S	2.11816	-3.36305	2.12262	FE	8.23168	2.74555	-0.00114891	FE	8.23197	2.74523	-0.00141237	FE	8.22209	2.74385	0.00127983	FE	8.22585	2.74325	0.00123779	S	2.16361	-3.38684	2.15579	S	2.13776	-3.38441	2.10534	S	2.15541	-3.39432	2.14669	S	2.1263	-3.39225	2.13299	FE	8.30121
S	2.11694	-3.36708	-3.34461	S	2.11651	-3.3696	-3.37007	S	2.11732	-3.36403	-3.36361	S	2.12118	-3.36701	-3.36292	FE	8.22214	2.74528	5.48228	FE	8.22437	2.74522	5.48172	FE	8.22595	2.74375	5.48331	FE	8.22544	2.74312	5.48412	S	2.14586	-3.38251	-3.39727	S	2.14557	-3.42975	-3.4179	S	2.15522	-3.38777	-3.38792	S	2.16498	-3.39092	-3.39967	FE	8.29116
S	-3.36913	2.11494	2.13731	S	-3.36143	2.12159	2.12235	S	-3.36295	2.12012	2.11882	S	-3.36073	2.11791	2.11927	FE	-0.0022352	-2.74377	-2.74582	FE	-0.0156253	-2.75464	-2.78368	FE	-0.00332073	-2.75091	-2.74516	FE	-0.0158261	-2.75588	-2.78528	S	-3.3993	2.14961	2.14636	S	-3.40196	2.15878	2.14864	S	-3.39795	2.14723	2.14718	S	-3.40386	2.13791	2.16751	FE	0.000970635
S	-3.39623	2.08785	-3.39631	S	-3.35858	2.1174	-3.36167	S	-3.36209	2.11817	-3.36449	S	-3.36826	2.11736	-3.3668	FE	-0.00497232	-2.73436	2.74201	FE	-0.00937834	-2.74326	2.75013	FE	-0.0110695	-2.78516	2.75521	FE	-0.0150314	-2.78414	2.76072	S	-3.40074	2.14846	-3.39334	S	-3.38157	2.13843	-3.3628	S	-3.3852	2.14844	-3.38344	S	-3.36173	2.13664	-3.35635	FE	0.00723655
S	-3.34467	-3.36715	2.11697	S	-3.36666	-3.36302	2.11987	S	-3.36688	-3.36682	2.11994	S	-3.36438	-3.36582	2.12001	FE	-0.0101648	2.73151	-2.78277	FE	-0.000829934	2.73895	-2.73878	FE	0.00445586	2.7425	-2.74811	FE	0.000206756	2.74173	-2.74272	S	-3.39551	-3.37201	2.15196	S	-3.39816	-3.38609	2.13045	S	-3.3821	-3.39366	2.14911	S	-3.40537	-3.40113	2.16833	FE	-0.0255254
S	-3.36502	-3.34257	-3.36509	S	-3.36217	-3.36612	-3.36389	S	-3.36494	-3.36604	-3.36245	S	-3.36846	-3.36945	-3.36621	FE	-0.00418298	2.74337	2.75122	FE	-0.00358515	2.74753	2.74905	FE	0.00927085	2.75718	2.78729	FE	-0.00337778	2.75321	2.74852	S	-3.39447	-3.3783	-3.39353	S	-3.37752	-3.40425	-3.38371	S	-3.37718	-3.38527	-3.37763	S	-3.37156	-3.39233	-3.36756	FE	-0.00404869
S	0.621098	-2.11935	-0.622264	S	0.610537	-2.12799	-0.617336	S	0.605826	-2.12305	-0.625761	S	0.611486	-2.12264	-0.609542	FE	5.48329	-2.74319	-2.74497	FE	5.48915	-2.74429	-2.74832	FE	5.48422	-2.74118	-2.74197	FE	5.48754	-2.74262	-2.74327	AS	0.745634	-2.49586	-0.717135	S	0.620551	-2.14644	-0.619089	S	0.643248	-2.12297	-0.608443	S	0.590395	-2.14584	-0.610453	FE	5.5309
S	0.618451	-2.12777	4.86934	S	0.616467	-2.11828	4.86087	S	0.615272	-2.12952	4.86186	S	0.619462	-2.12301	4.85615	FE	5.48103	-2.73837	2.7384	FE	5.4874	-2.73817	2.73903	FE	5.48747	-2.73953	2.74215	FE	5.49141	-2.74029	2.74382	S	0.631355	-2.13204	4.91516	S	0.613609	-2.13204	4.88171	S	0.617941	-2.15516	4.9152	S	0.607174	-2.14994	4.89153	FE	5.53132
S	0.6289	3.35886	-0.622029	S	0.617518	3.37624	-0.614277	S	0.620937	3.37376	-0.618617	S	0.6243	3.3782	-0.617014	FE	5.49028	2.74033	-2.74438	FE	5.48839	2.74116	-2.74307	FE	5.48721	2.74214	-2.74153	FE	5.48554	2.74168	-2.74007	AS	0.655865	3.4176	-0.661722	S	0.60942	3.42175	-0.592977	S	0.624576	3.40575	-0.620623	S	0.617834	3.41245	-0.62651	FE	5.53458
S	0.619356	3.36072	4.85782	S	0.620644	3.36568	4.86368	S	0.624625	3.36405	4.86278	S	0.626653	3.36814	4.85758	FE	5.48925	2.74491	2.74314	FE	5.48691	2.74588	2.74268	FE	5.49342	2.74737	2.74532	FE	5.49173	2.74603	2.74488	S	0.622586	3.38342	4.9006	S	0.612212	3.40811	4.91252	S	0.615288	3.38606	4.91197	S	0.612557	3.39445	4.88909	FE	5.53409
S	-4.85853	-2.11715	-0.620048	S	-4.85365	-2.12309	-0.625192	S	-4.86102	-2.12224	-0.623372	S	-4.86208	-2.12528	-0.622938	FE	-5.48541	-2.74526	-2.7425	FE	-5.48511	-2.74452	-2.74343	FE	-5.48535	-2.74214	-2.74321	FE	-5.48679	-2.74402	-2.74371	S	-4.91243	-2.12916	-0.629297	S	-4.88947	-2.15655	-0.629499	S	-4.8969	-2.14486	-0.616481	S	-4.91623	-2.1531	-0.594671	FE	-5.53128
S	-4.85315	-2.12313	4.86415	S	-4.86328	-2.11986	4.85966	S	-4.85919	-2.12227	4.85949	S	-4.86126	-2.12308	4.85828	FE	-5.48624	-2.74056	2.74186	FE	-5.48569	-2.74008	2.74207	FE	-5.48516	-2.74113	2.7397	FE	-5.48652	-2.7416	2.74099	S	-4.91086	-2.13104	4.91123	S	-4.92336	-2.13121	4.88257	S	-4.90319	-2.14739	4.91642	S	-4.91564	-2.15126	4.92749	FE	-5.5236
S	-4.86348	3.35838	-0.612678	S	-4.85278	3.36597	-0.621498	S	-4.85781	3.36431	-0.622208	S	-4.85699	3.361	-0.622361	FE	-5.48423	2.7389	-2.74078	FE	-5.48135	2.73914	-2.74022	FE	-5.48839	2.74076	-2.74403	FE	-5.48369	2.73932	-2.74212	S	-4.90957	3.38695	-0.626114	S	-4.90976	3.39585	-0.601307	S	-4.91236	3.39057	-0.615147	S	-4.91327	3.38549	-0.598147	FE	-5.53742
S	-4.86501	3.36268	4.85975	S	-4.86021	3.36391	4.86414	S	-4.85572	3.36235	4.86157	S	-4.85738	3.36032	4.85988	FE	-5.48541	2.74416	2.74582	FE	-5.48199	2.74284	2.74313	FE	-5.48675	2.74324	2.74185	FE	-5.48274	2.74167	2.74054	S	-4.91675	3.38744	4.90874	S	-4.92219	3.40713	4.91058	S	-4.91359	3.38592	4.91382	S	-4.91458	3.38353	4.92612	FE	-5.53751
S	-0.612716	0.620567	-2.1257	S	-0.63418	0.614284	-2.12451	S	-0.636134	0.620978	-2.13928	SE	-0.648216	0.633384	-2.10532	S	2.12833	2.12271	2.12678	S	2.12421	2.1321	2.13031	S	2.13982	2.13695	2.13727	S	2.13555	2.13337	2.12937	S	-0.639579	0.649176	-2.14472	S	-0.624459	0.609361	-2.12859	S	-0.619155	0.62207	-2.15055	AS	-0.332725	0.738112	-2.088	S	2.16324
S	-0.62417	0.621403	3.36279	S	-0.627901	0.6256	3.36961	S	-0.657342	0.655973	3.3986	S	-0.624189	0.623922	3.36805	S	2.12309	2.11938	-3.37314	S	2.1252	2.12307	-3.37389	S	2.12891	2.12145	-3.37127	S	2.12471	2.12125	-3.37016	S	-0.627705	0.624475	3.39741	S	-0.645786	0.639711	3.39024	S	-0.666111	0.678408	3.44496	S	-0.642509	0.619168	3.38323	S	2.14565
S	-0.617846	-4.85107	-2.12104	S	-0.623544	-4.8637	-2.12141	S	-0.625263	-4.86194	-2.11823	S	-0.626579	-4.85761	-2.11745	S	2.11555	-3.36575	2.11845	S	2.12082	-3.36996	2.12072	S	2.12251	-3.37269	2.12683	S	2.12704	-3.37138	2.127	S	-0.628052	-4.8976	-2.17172	S	-0.617877	-4.92896	-2.1502	S	-0.6115	-4.90368	-2.13726	S	-0.616926	-4.90454	-2.14054	S	2.1511
S	-0.622242	-4.86296	3.36474	S	-0.625804	-4.86008	3.36207	S	-0.628393	-4.87929	3.37013	S	-0.624251	-4.86197	3.36281	S	2.1164	-3.36841	-3.36748	S	2.11563	-3.37302	-3.37565	S	2.11991	-3.36618	-3.36384	S	2.11833	-3.36784	-3.3706	S	-0.60898	-4.902	3.39363	S	-0.630976	-4.90242	3.36431	S	-0.627364	-4.93593	3.3972	S	-0.636148	-4.91561	3.38625	S	2.14672
S	4.85977	0.619053	-2.12142	S	4.87011	0.617319	-2.13168	S	4.86197	0.619263	-2.12975	S	4.85918	0.619439	-2.12656	S	7.60673	2.12362	2.12013	S	7.60643	2.12359	2.1187	S	7.60553	2.12275	2.12099	S	7.606	2.12191	2.12074	S	4.90578	0.618047	-2.13805	S	4.95531	0.600151	-2.14216	S	4.8973	0.610221	-2.15843	S	4.91728	0.623946	-2.16798	S	7.67588
S	4.86	0.6268	3.35678	S	4.86117	0.629262	3.3686	S	4.88036	0.630319	3.36779	S	4.86417	0.625139	3.36284	S	7.60583	2.11902	-3.36351	S	7.60614	2.1197	-3.36404	S	7.60286	2.12002	-3.36262	S	7.60245	2.1194	-3.36154	S	4.90922	0.616813	3.39342	S	4.89722	0.642378	3.35004	S	4.92413	0.61757	3.39022	S	4.88517	0.623173	3.37366	S	7.67249
S	4.86198	-4.86059	-2.1192	S	4.86037	-4.86089	-2.12564	S	4.85829	-4.85715	-2.11887	S	4.8601	-4.85958	-2.11885	S	7.60042	-3.35965	2.11692	S	7.60525	-3.35912	2.11668	S	7.60398	-3.35995	2.11978	S	7.60607	-3.36098	2.12045	S	4.9233	-4.91026	-2.1417	S	4.9242	-4.93715	-2.16377	S	4.91398	-4.90934	-2.14382	S	4.91273	-4.90574	-2.15701	S	7.67523
S	4.86936	-4.8656	3.35637	S	4.85794	-4.85558	3.35898	S	4.85988	-4.85647	3.365	S	4.86055	-4.85805	3.36308	S	7.6015	-3.36289	-3.36548	S	7.60541	-3.36354	-3.36657	S	7.60229	-3.36168	-3.36249	S	7.60313	-3.36373	-3.36253	S	4.92554	-4.91072	3.39182	S	4.91104	-4.89906	3.35293	S	4.91057	-4.914	3.38887	S	4.8884	-4.91138	3.3753	S	7.67337
S	-2.11924	-0.622098	0.623481	S	-2.13487	-0.62971	0.629424	S	-2.13978	-0.622841	0.616596	S	-2.13715	-0.631374	0.631967	S	-3.37189	2.12234	2.12962	S	-3.36652	2.12152	2.12229	S	-3.37835	2.12473	2.12079	S	-3.36923	2.12099	2.11885	S	-2.17168	-0.596864	0.624385	S	-2.17651	-0.635141	0.633228	S	-2.1748	-0.610149	0.610314	S	-2.22369	-0.666674	0.711245	S	-3.40486
S	-2.11731	-0.620163	-4.86088	S	-2.1189	-0.625988	-4.8616	S	-2.12068	-0.624894	-4.8601	S	-2.12618	-0.62395	-4.86264	S	-3.36809	2.1185	-3.36992	S	-3.36448	2.11743	-3.36115	S	-3.36838	2.11887	-3.36602	S	-3.36659	2.11811	-3.36442	S	-2.15412	-0.613626	-4.91043	S	-2.13545	-0.637701	-4.89229	S	-2.13847	-0.619175	-4.89985	S	-2.11221	-0.618985	-4.87168	S	-3.39975
S	-2.12521	4.86207	0.628892	S	-2.11954	4.86099	0.626033	S	-2.11895	4.85848	0.622517	S	-2.11774	4.85823	0.621165	S	-3.36942	-3.36774	2.11894	S	-3.37466	-3.36302	2.12238	S	-3.36982	-3.36554	2.11909	S	-3.37652	-3.36555	2.12112	S	-2.13201	4.91487	0.610825	S	-2.1514	4.92131	0.640092	S	-2.14482	4.90976	0.625069	S	-2.15047	4.90625	0.632197	S	-3.37775
S	-2.12569	4.87144	-4.86352	S	-2.11602	4.85814	-4.85811	S	-2.11745	4.85714	-4.85812	S	-2.11713	4.86039	-4.8619	S	-3.3679	-3.36931	-3.36698	S	-3.3705	-3.36839	-3.36831	S	-3.3671	-3.36481	-3.36478	S	-3.37277	-3.36835	-3.36846	S	-2.15511	4.901	-4.91413	S	-2.13904	4.904	-4.87606	S	-2.14119	4.90855	-4.90218	S	-2.11777	4.91418	-4.8985	S	-3.39054
S	3.35631	-0.614743	0.618473	SE	3.41068	-0.66859	0.668555	S	3.40481	-0.649324	0.654272	S	3.40075	-0.657629	0.660831	S	0.629191	-2.1215	-0.62744	SE	0.625828	-2.11216	-0.632115	S	0.610833	-2.14235	-0.630504	SE	0.622761	-2.10948	-0.642397	S	3.39413	-0.625954	0.631927	AS	3.52178	-0.767773	0.385631	S	3.42768	-0.65661	0.630417	S	3.36377	-0.660964	0.641081	S	0.647545
S	3.36092	-0.619933	-4.85316	S	3.37179	-0.629429	-4.87698	S	3.37011	-0.625152	-4.87706	S	3.37147	-0.623601	-4.88141	S	0.61873	-2.11756	4.86165	S	0.618968	-2.11614	4.85739	S	0.616593	-2.13089	4.86222	S	0.617423	-2.12645	4.85797	S	3.38104	-0.620083	-4.9052	S	3.3999	-0.641042	-4.90144	S	3.40142	-0.632162	-4.94019	S	3.43135	-0.6262	-4.96565	S	0.624614
S	3.36058	4.8577	0.617047	S	3.37158	4.877	0.629675	S	3.36934	4.88063	0.628045	S	3.37001	4.88001	0.626911	SE	0.639712	3.38469	-0.638555	S	0.617273	3.37945	-0.615183	S	0.655018	3.40492	-0.649853	S	0.622403	3.37714	-0.619294	S	3.41741	4.86141	0.639501	S	3.40584	4.95072	0.643502	S	3.39173	4.92817	0.625159	S	3.38292	4.93337	0.610834	AS	0.752267
S	3.3628	4.8599	-4.86264	S	3.36813	4.86165	-4.86097	S	3.36607	4.86266	-4.85793	S	3.36585	4.86371	-4.86044	S	0.621908	3.36808	4.85849	S	0.621315	3.36431	4.86495	S	0.629658	3.36796	4.88218	S	0.624623	3.3636	4.86453	S	3.38088	4.89524	-4.90718	S	3.39815	4.90173	-4.88034	S	3.38836	4.906	-4.90959	S	3.40633	4.91907	-4.92639	S	0.622594
S	-2.1165	-2.11321	-2.11706	S	-2.12075	-2.12361	-2.12033	S	-2.1234	-2.12179	-2.12057	S	-2.13215	-2.12459	-2.12507	S	6.11325	-2.1197	-0.626963	S	6.12262	-2.11893	-0.628672	S	6.10851	-2.11879	-0.622504	S	6.11489	-2.11836	-0.623071	S	-2.14998	-2.1355	-2.1505	S	-2.13543	-2.15816	-2.14109	S	-2.13492	-2.13933	-2.13896	S	-2.13824	-2.15485	-2.11143	S	6.16083
S	-2.11527	-2.1191	3.3655	S	-2.12361	-2.11942	3.36368	S	-2.12198	-2.12697	3.36381	S	-2.12165	-2.12184	3.36302	S	6.10162	-2.11678	4.85838	S	6.10561	-2.11645	4.85726	S	6.10829	-2.11803	4.86021	S	6.10898	-2.11755	4.86094	S	-2.148	-2.1302	3.39541	S	-2.15581	-2.13779	3.37035	S	-2.14851	-2.15734	3.4021	S	-2.15995	-2.15574	3.41042	S	6.15219
SE	-2.10398	3.38009	-2.10407	S	-2.11554	3.36101	-2.11783	S	-2.11784	3.36115	-2.11957	S	-2.11987	3.36954	-2.12392	S	6.11835	3.36781	-0.625341	S	6.11547	3.36787	-0.624852	S	6.10795	3.36677	-0.620269	S	6.11011	3.36558	-0.620744	S	-2.13991	3.38186	-2.15251	S	-2.13922	3.38672	-2.1229	S	-2.14163	3.39043	-2.13982	S	-2.12273	3.39143	-2.12897	S	6.16362
S	-2.12115	3.36345	3.3667	S	-2.12002	3.3641	3.36592	S	-2.12093	3.36545	3.36264	S	-2.11742	3.36147	3.36227	S	6.10431	3.36671	4.86161	S	6.10597	3.36632	4.86122	S	6.11056	3.36678	4.86384	S	6.1094	3.36606	4.86366	S	-2.14887	3.38637	3.38591	S	-2.15988	3.40487	3.39126	S	-2.15619	3.39318	3.38961	S	-2.15525	3.3823	3.40008	S	6.15077
S	3.36496	-2.11855	-2.11527	S	3.35746	-2.12964	-2.13012	S	3.3613	-2.11832	-2.12475	S	3.36304	-2.12112	-2.12459	S	-4.86531	-2.12682	-0.622869	S	-4.86661	-2.11953	-0.624279	S	-4.86759	-2.12033	-0.624096	S	-4.86798	-2.11932	-0.625603	S	3.40345	-2.13997	-2.1417	S	3.41089	-2.22714	-2.17058	S	3.39293	-2.13914	-2.15091	S	3.39745	-2.13835	-2.16192	S	-4.90162
SE	3.37798	-2.10609	3.37802	S	3.35438	-2.12248	3.37427	S	3.36757	-2.1206	3.36995	S	3.36209	-2.12234	3.36808	S	-4.86527	-2.11812	4.86189	S	-4.86482	-2.11775	4.85978	S	-4.86189	-2.11993	4.85882	S	-4.86402	-2.11961	4.85891	S	3.39818	-2.14152	3.39647	S	3.37615	-2.10851	3.3198	S	3.39944	-2.15077	3.39159	S	3.36524	-2.14888	3.37645	S	-4.9097
S	3.36675	3.36292	-2.12064	S	3.36935	3.37064	-2.12106	S	3.36673	3.3716	-2.11845	S	3.36868	3.37217	-2.11881	S	-4.86723	3.36731	-0.620603	S	-4.86279	3.3626	-0.620861	S	-4.8836	3.36857	-0.627416	S	-4.86489	3.36253	-0.623266	S	3.39384	3.37318	-2.13842	S	3.39961	3.38379	-2.1129	S	3.38265	3.39094	-2.14312	S	3.39591	3.40717	-2.15538	S	-4.92583
S	3.36141	3.36462	3.36078	S	3.36567	3.37162	3.36803	S	3.37209	3.37274	3.36979	S	3.36882	3.36906	3.36588	S	-4.86483	3.36528	4.86341	S	-4.86184	3.36411	4.86251	S	-4.86209	3.36279	4.86019	S	-4.86082	3.36208	4.85982	S	3.38795	3.37109	3.393	S	3.39179	3.42911	3.41034	S	3.37909	3.3852	3.38468	S	3.36929	3.39218	3.36624	S	-4.91609
S	-0.62361	2.1172	0.626914	S	-0.628603	2.12103	0.627289	S	-0.628526	2.11955	0.61864	S	-0.622715	2.12087	0.634345	S	-0.622521	0.619097	-2.12859	S	-0.643788	0.621621	-2.12236	S	-0.632742	0.609924	-2.1413	S	-0.641836	0.626816	-2.13788	S	-0.661281	2.1446	0.658045	S	-0.647922	2.15718	0.637041	S	-0.626988	2.15675	0.618725	S	-0.664195	2.13692	0.613272	S	-0.646751
S	-0.614973	2.12102	-4.86273	S	-0.618904	2.11784	-4.85765	S	-0.61871	2.12136	-4.85511	S	-0.614376	2.12851	-4.86178	S	-0.627866	0.625146	3.37794	S	-0.63489	0.629338	3.37335	S	-0.654163	0.652193	3.40588	S	-0.664452	0.66084	3.40253	S	-0.637904	2.13888	-4.93301	S	-0.614022	2.13185	-4.87504	S	-0.61741	2.14868	-4.89722	S	-0.582375	2.15812	-4.90949	S	-0.62837
S	-0.625112	-3.3623	0.618609	S	-0.62944	-3.36801	0.623533	S	-0.631324	-3.37338	0.625497	S	-0.627682	-3.36822	0.626311	S	-0.626854	-4.85735	-2.12305	S	-0.625884	-4.86447	-2.12685	S	-0.625568	-4.86248	-2.12058	S	-0.626382	-4.86342	-2.12564	S	-0.70885	-3.33493	0.705728	S	-0.627628	-3.39523	0.608867	S	-0.611267	-3.39552	0.62887	S	-0.639795	-3.40662	0.630275	S	-0.629083
S	-0.622591	-3.36222	-4.856	S	-0.621981	-3.36593	-4.86213	S	-0.625623	-3.36887	-4.85595	S	-0.623527	-3.36422	-4.86206	S	-0.627809	-4.85394	3.36303	S	-0.624821	-4.8637	3.36666	S	-0.627903	-4.87894	3.37119	S	-0.62771	-4.88202	3.37282	S	-0.627608	-3.3874	-4.93284	S	-0.615195	-3.4065	-4.90303	S	-0.61303	-3.39139	-4.89517	S	-0.59755	-3.38767	-4.91127	S	-0.622901
S	4.85535	2.11565	0.621861	S	4.87163	2.12998	0.615353	S	4.86329	2.12917	0.622487	S	4.86353	2.12716	0.622606	S	4.8738	0.620099	-2.12137	S	4.87193	0.615474	-2.12903	S	4.86772	0.617026	-2.12842	S	4.86587	0.616708	-2.12667	S	4.93128	2.12432	0.631031	S	4.91678	2.14581	0.611519	S	4.89468	2.14064	0.611541	S	4.87798	2.14796	0.602841	S	4.91552
S	4.85695	2.11973	-4.86753	S	4.86573	2.12029	-4.86294	S	4.86397	2.12149	-4.86103	S	4.86281	2.12158	-4.86258	S	4.86427	0.62682	3.36949	S	4.8648	0.626961	3.36967	S	4.88616	0.62968	3.36868	S	4.88467	0.62913	3.36922	S	4.90211	2.13564	-4.90426	S	4.92377	2.1314	-4.88928	S	4.90793	2.13954	-4.91359	S	4.92764	2.15013	-4.92787	S	4.9082
S	4.86703	-3.3651	0.61932	S	4.86465	-3.37424	0.612268	S	4.86107	-3.36359	0.621378	S	4.86338	-3.3664	0.621008	S	4.86108	-4.86318	-2.12347	S	4.8645	-4.86265	-2.12364	S	4.86213	-4.85844	-2.11875	S	4.86355	-4.85951	-2.1183	S	4.9502	-3.39942	0.634836	S	4.92794	-3.42237	0.585422	S	4.91936	-3.39775	0.618466	S	4.89168	-3.39613	0.60817	S	4.91132
S	4.8625	-3.3648	-4.85506	S	4.86153	-3.36364	-4.86572	S	4.85942	-3.36096	-4.86025	S	4.8585	-3.36235	-4.86228	S	4.85972	-4.85824	3.35922	S	4.86277	-4.85695	3.36043	S	4.86539	-4.85614	3.36488	S	4.86565	-4.85699	3.36531	S	4.91201	-3.38762	-4.90546	S	4.92519	-3.40873	-4.92008	S	4.91542	-3.3905	-4.9097	S	4.92289	-3.38409	-4.92321	S	4.91108
S	0.619315	-0.617047	2.11895	S	0.612077	-0.615277	2.12961	SE	0.632417	-0.637663	2.10413	S	0.621395	-0.62604	2.1387	S	-6.10816	0.618285	-2.12194	S	-6.10157	0.619853	-2.12057	S	-6.1078	0.62114	-2.12259	S	-6.10677	0.62075	-2.1214	S	0.613386	-0.616452	2.14924	S	0.582109	-0.600767	2.13462	AS	0.352174	-0.717485	2.0447	S	0.605212	-0.614915	2.13356	S	-6.16329
S	0.625977	-0.624608	-3.36427	S	0.621035	-0.627254	-3.37062	S	0.623752	-0.627601	-3.37324	S	0.655126	-0.657021	-3.4016	S	-6.10884	0.625535	3.36874	S	-6.10276	0.624283	3.36429	S	-6.10376	0.622597	3.36214	S	-6.10381	0.622641	3.36273	S	0.609606	-0.608632	-3.3807	S	0.640194	-0.643015	-3.35756	S	0.639803	-0.622189	-3.39278	S	0.706762	-0.677566	-3.45853	S	-6.16014
S	0.614526	4.85486	2.1177	S	0.62186	4.86291	2.12365	S	0.626371	4.8578	2.11956	S	0.624835	4.86295	2.12105	S	-6.10563	-4.86358	-2.12165	S	-6.10424	-4.86301	-2.12153	S	-6.10739	-4.86029	-2.12243	S	-6.10566	-4.86252	-2.1212	S	0.618216	4.91576	2.12353	S	0.613157	4.93652	2.15622	S	0.624195	4.90858	2.14096	S	0.609723	4.90736	2.13466	S	-6.1534
S	0.626952	4.86045	-3.36688	S	0.62428	4.8576	-3.36097	S	0.624991	4.85997	-3.36021	S	0.62838	4.87829	-3.36704	S	-6.10647	-4.85955	3.36097	S	-6.10518	-4.85975	3.36133	S	-6.10517	-4.85973	3.36136	S	-6.10496	-4.86067	3.36181	S	0.611807	4.89743	-3.40858	S	0.626322	4.89841	-3.36048	S	0.624804	4.91013	-3.38379	S	0.646041	4.948	-3.40329	S	-6.15138
S	-4.85508	-0.6216	2.11928	S	-4.84803	-0.616277	2.12651	S	-4.85231	-0.624183	2.1196	S	-4.85595	-0.623499	2.12326	SE	-2.11124	-0.642427	0.638909	S	-2.14551	-0.623487	0.62893	S	-2.14574	-0.63171	0.611123	S	-2.14526	-0.616782	0.617279	S	-4.91545	-0.612853	2.14657	S	-4.9129	-0.608741	2.13615	S	-4.90618	-0.626493	2.14596	S	-4.92968	-0.627961	2.17358	AS	-2.21613
S	-4.86342	-0.623017	-3.36021	S	-4.85428	-0.627636	-3.36756	S	-4.85744	-0.627648	-3.36705	S	-4.87624	-0.632683	-3.37273	S	-2.12099	-0.627225	-4.85721	S	-2.12559	-0.625566	-4.86179	S	-2.12537	-0.624798	-4.86191	S	-2.12759	-0.624898	-4.86238	S	-4.91987	-0.6116	-3.38903	S	-4.89157	-0.63909	-3.38267	S	-4.89844	-0.618877	-3.38608	S	-4.88177	-0.622678	-3.37406	S	-2.15149
S	-4.86013	4.85737	2.11773	S	-4.85863	4.86169	2.12348	S	-4.85821	4.86049	2.11913	S	-4.85738	4.859	2.11926	S	-2.12125	4.86301	0.626206	S	-2.12848	4.85624	0.623964	S	-2.1328	4.8608	0.616684	S	-2.12694	4.85469	0.621073	S	-4.90723	4.90276	2.14432	S	-4.9195	4.92958	2.15776	S	-4.91312	4.90867	2.14724	S	-4.9166	4.90591	2.16034	S	-2.15369
S	-4.86267	4.86911	-3.363	S	-4.85636	4.85807	-3.36	S	-4.85787	4.85861	-3.36145	S	-4.85892	4.85789	-3.36322	S	-2.12063	4.85908	-4.86128	S	-2.12038	4.85728	-4.85856	S	-2.12181	4.85754	-4.85819	S	-2.12167	4.85599	-4.85944	S	-4.91931	4.90348	-3.39093	S	-4.9064	4.90305	-3.35675	S	-4.90619	4.91145	-3.37968	S	-4.88828	4.90986	-3.36877	S	-2.14945
S	2.11769	0.62395	-0.626696	SE	2.07153	0.670615	-0.670597	SE	2.10266	0.642222	-0.644451	SE	2.10713	0.633136	-0.628443	SE	3.39111	-0.641032	0.641566	SE	3.4196	-0.669013	0.671284	S	3.41107	-0.650087	0.653725	S	3.41438	-0.649529	0.656885	S	2.13543	0.625286	-0.611305	AS	2.01563	0.767179	-0.393281	AS	2.15615	0.672028	-0.709765	AS	2.16021	0.66957	-0.735005	AS	3.42739
S	2.11512	0.624865	4.85836	S	2.1104	0.631442	4.87495	S	2.12413	0.625867	4.8572	S	2.12009	0.626214	4.85618	S	3.36626	-0.626439	-4.85791	S	3.37074	-0.630385	-4.87455	S	3.37362	-0.626345	-4.87733	S	3.37122	-0.626258	-4.87533	S	2.14226	0.621855	4.91194	S	2.1375	0.640416	4.89393	S	2.14867	0.616868	4.89033	S	2.13354	0.624571	4.88064	S	3.38986
S	2.12181	-4.86547	-0.62507	S	2.11061	-4.87499	-0.631677	S	2.11396	-4.85429	-0.622104	S	2.1158	-4.85538	-0.622438	S	3.3753	4.85802	0.627836	S	3.37734	4.87287	0.633694	S	3.37332	4.88143	0.63017	S	3.37581	4.87727	0.632733	S	2.207	-4.9126	-0.613217	S	2.13153	-4.95134	-0.651058	S	2.14975	-4.90415	-0.623064	S	2.13347	-4.90609	-0.635419	S	3.41436
S	2.11897	-4.86476	4.86706	S	2.11409	-4.85963	4.85896	S	2.1164	-4.86136	4.86322	S	2.11809	-4.85894	4.8607	S	3.3644	4.85996	-4.86015	S	3.3663	4.85999	-4.85949	S	3.36643	4.86254	-4.85555	S	3.36517	4.86088	-4.85649	S	2.15559	-4.90469	4.90782	S	2.13922	-4.90236	4.87278	S	2.14332	-4.91609	4.91216	S	2.12545	-4.91121	4.89573	S	3.38704
S	-3.3631	0.621386	-0.614957	S	-3.34731	0.627704	-0.6274	S	-3.37046	0.625219	-0.629357	S	-3.37585	0.61681	-0.622457	S	-7.59623	-0.624779	0.625518	S	-7.59327	-0.622801	0.622767	S	-7.60208	-0.622005	0.619477	S	-7.59968	-0.622901	0.620361	S	-3.40663	0.635379	-0.62655	S	-3.36083	0.635785	-0.62567	S	-3.39763	0.638869	-0.638954	S	-3.41449	0.613272	-0.569906	S	-7.66769
S	-3.36438	0.616574	4.85692	S	-3.3633	0.623965	4.86364	S	-3.3652	0.620215	4.86382	S	-3.3628	0.620933	4.85897	S	-7.60238	-0.625781	-4.86044	S	-7.5983	-0.625181	-4.86133	S	-7.59998	-0.623535	-4.86201	S	-7.60004	-0.624907	-4.86068	S	-3.39482	0.627574	4.90873	S	-3.4019	0.638332	4.89985	S	-3.39754	0.620845	4.9224	S	-3.39118	0.619445	4.94447	S	-7.67827
S	-3.36274	-4.853	-0.619472	S	-3.36267	-4.86302	-0.623975	S	-3.36487	-4.86223	-0.622023	S	-3.36415	-4.86398	-0.622909	S	-7.60103	4.86093	0.625462	S	-7.59711	4.86019	0.625021	S	-7.60323	4.86144	0.621234	S	-7.59842	4.85889	0.622304	S	-3.38284	-4.89518	-0.622572	S	-3.38598	-4.92068	-0.63254	S	-3.37783	-4.90677	-0.614658	S	-3.39101	-4.91904	-0.606723	S	-7.6759
S	-3.3643	-4.85805	4.85946	S	-3.36614	-4.86017	4.86017	S	-3.36439	-4.86304	4.86148	S	-3.36384	-4.86311	4.85925	S	-7.60152	4.8583	-4.85809	S	-7.59943	4.85785	-4.85858	S	-7.60113	4.85987	-4.861	S	-7.60032	4.85795	-4.86004	S	-3.38181	-4.89738	4.90559	S	-3.39835	-4.90337	4.88361	S	-3.38545	-4.91204	4.91867	S	-3.39967	-4.91721	4.92683	S	-7.6768
																S	-2.12788	-2.13034	-2.12251	S	-2.12814	-2.12821	-2.12855	S	-2.12537	-2.12339	-2.12309	S	-2.12896	-2.12711	-2.13081																	S	-2.14895
																S	-2.12815	-2.11894	3.37252	S	-2.12795	-2.11865	3.36366	S	-2.12376	-2.12657	3.36158	S	-2.1278	-2.12558	3.3631																	S	-2.1413
																S	-2.12305	3.35664	-2.12881	S	-2.12156	3.36073	-2.1169	S	-2.12769	3.36075	-2.12038	S	-2.12178	3.36119	-2.11972																	S	-2.15172
																S	-2.12476	3.36646	3.36635	S	-2.12299	3.36491	3.36654	S	-2.12451	3.36773	3.36879	S	-2.12547	3.36685	3.3631																	S	-2.15338
																S	3.35996	-2.13014	-2.1232	S	3.36823	-2.13528	-2.1305	S	3.36403	-2.12063	-2.12497	S	3.37299	-2.12379	-2.12631																	S	3.38259
																S	3.35816	-2.12024	3.37213	S	3.35979	-2.12336	3.37659	S	3.37153	-2.12157	3.36981	S	3.37361	-2.12069	3.37158																	S	3.38456
																S	3.37731	3.35957	-2.12355	S	3.36955	3.36955	-2.1193	S	3.37418	3.36948	-2.11971	S	3.36828	3.37048	-2.11675																	S	3.40203
																S	3.36667	3.36643	3.36644	S	3.36728	3.36989	3.3705	S	3.37893	3.37433	3.37539	S	3.37399	3.37213	3.3726																	S	3.39209
																S	-7.60111	-2.12252	-2.12021	S	-7.598	-2.12173	-2.12138	S	-7.60202	-2.12041	-2.12158	S	-7.60026	-2.12103	-2.12118																	S	-7.67158
																S	-7.60324	-2.11902	3.36354	S	-7.60052	-2.11799	3.36326	S	-7.60023	-2.11881	3.36095	S	-7.59924	-2.11871	3.36249																	S	-7.67054
																S	-7.5983	3.36196	-2.11873	S	-7.59716	3.36183	-2.11912	S	-7.60409	3.36208	-2.12171	S	-7.60007	3.36115	-2.12008																	S	-7.67435
																S	-7.60179	3.36548	3.36591	S	-7.59978	3.36424	3.36477	S	-7.60111	3.36455	3.36223	S	-7.59848	3.36311	3.36306																	S	-7.67715
																S	-0.650737	2.08975	0.651822	S	-0.637854	2.13818	0.632803	SE	-0.646386	2.10299	0.636673	S	-0.634987	2.13733	0.6246																	S	-0.701059
																S	-0.628086	2.11465	-4.87626	S	-0.62347	2.11823	-4.85644	S	-0.622589	2.11828	-4.85124	S	-0.622617	2.1215	-4.85451																	S	-0.634589
																S	-0.628151	-3.35444	0.621219	S	-0.667747	-3.40204	0.658211	S	-0.634126	-3.37778	0.626485	S	-0.666746	-3.40645	0.659025																	S	-0.622389
																S	-0.624553	-3.36454	-4.86245	S	-0.630116	-3.37055	-4.87952	S	-0.627089	-3.36881	-4.85767	S	-0.633115	-3.37403	-4.87561																	S	-0.623198
																S	4.89347	2.11737	0.620649	S	4.87529	2.12848	0.61726	S	4.86954	2.12706	0.625384	S	4.86808	2.12777	0.624853																	S	4.94492
																S	4.86422	2.1186	-4.86038	S	4.86467	2.11862	-4.8611	S	4.86744	2.11995	-4.86025	S	4.86456	2.11961	-4.85939																	S	4.90913
																S	4.86602	-3.37153	0.615209	S	4.88669	-3.37986	0.617988	S	4.8678	-3.36327	0.621954	S	4.88429	-3.36902	0.626308																	S	4.91094
																S	4.86055	-3.36461	-4.86293	S	4.86324	-3.36512	-4.86427	S	4.86245	-3.36149	-4.86039	S	4.86258	-3.36278	-4.86016																	S	4.90968
																S	-6.10404	2.12055	0.624326	S	-6.10148	2.11948	0.623546	S	-6.11221	2.1193	0.621157	S	-6.10518	2.11863	0.621283																	S	-6.15794
																S	-6.10564	2.11735	-4.85803	S	-6.10248	2.11685	-4.859	S	-6.10508	2.11791	-4.86215	S	-6.1045	2.11701	-4.8604																	S	-6.1602
																S	-6.1069	-3.36524	0.621528	S	-6.10359	-3.3643	0.621149	S	-6.10729	-3.36235	0.620316	S	-6.10555	-3.36453	0.620388																	S	-6.14556
																S	-6.10604	-3.36583	-4.86152	S	-6.1047	-3.36606	-4.86207	S	-6.10465	-3.36372	-4.86261	S	-6.10628	-3.36584	-4.86205																	S	-6.15378
																S	0.628394	-0.610762	2.13227	S	0.604887	-0.606601	2.13168	SE	0.636325	-0.645126	2.10396	SE	0.626569	-0.628367	2.10846																	S	0.645175
																S	0.621639	-0.624484	-3.3662	S	0.613105	-0.625216	-3.37807	S	0.626249	-0.632789	-3.37677	S	0.618123	-0.626182	-3.38184																	S	0.619862
																S	0.616019	4.87129	2.12333	S	0.62126	4.8612	2.12555	S	0.625832	4.85832	2.12724	S	0.626021	4.85746	2.12204																	S	0.621369
																S	0.617204	4.86058	-3.37222	S	0.621673	4.85541	-3.3618	S	0.622482	4.86251	-3.36264	S	0.623362	4.85772	-3.3612																	S	0.61852
																S	6.11693	-0.616325	2.12217	S	6.12388	-0.61396	2.12301	S	6.11986	-0.619066	2.12182	S	6.12048	-0.619607	2.12217																	S	6.16409
																S	6.10834	-0.623446	-3.36587	S	6.11389	-0.624072	-3.37024	S	6.11127	-0.623575	-3.36595	S	6.11107	-0.62408	-3.36589																	S	6.15346
																S	6.10652	4.86343	2.12076	S	6.1093	4.86305	2.12127	S	6.10819	4.86549	2.1215	S	6.11007	4.86289	2.12219																	S	6.15391
																S	6.10583	4.86072	-3.36344	S	6.10798	4.86013	-3.36314	S	6.10562	4.86229	-3.36015	S	6.10622	4.86048	-3.3603																	S	6.15154
																S	-4.86543	-0.61567	2.12986	S	-4.86461	-0.620818	2.12121	S	-4.86708	-0.62209	2.1165	S	-4.86765	-0.623225	2.11715																	S	-4.90526
																S	-4.86488	-0.625691	-3.36328	S	-4.8632	-0.625585	-3.3638	S	-4.86605	-0.623398	-3.36469	S	-4.86644	-0.625247	-3.3646																	S	-4.92017
																S	-4.86314	4.86132	2.1225	S	-4.86157	4.86111	2.12184	S	-4.86555	4.86134	2.11837	S	-4.86285	4.85935	2.11844																	S	-4.91415
																S	-4.86241	4.85722	-3.36161	S	-4.86093	4.85757	-3.36078	S	-4.8637	4.85972	-3.36309	S	-4.86221	4.85712	-3.36315																	S	-4.91401
																S	2.11481	0.658524	-0.655044	SE	2.07172	0.678892	-0.664529	SE	2.10554	0.636285	-0.643969	SE	2.10614	0.651773	-0.639117																	S	2.15827
																S	2.11492	0.628086	4.87879	S	2.11074	0.6308	4.87608	S	2.12767	0.62512	4.85959	S	2.1248	0.626282	4.8588																	S	2.13596
																S	2.11839	-4.8696	-0.625346	S	2.12083	-4.87755	-0.625211	S	2.12079	-4.85208	-0.620184	S	2.12563	-4.85696	-0.617013																	S	2.14301
																S	2.11694	-4.8584	4.85809	S	2.1167	-4.8609	4.85924	S	2.1199	-4.8616	4.86484	S	2.11909	-4.86168	4.86261																	S	2.14451
																S	7.62478	0.62773	-0.627235	S	7.6268	0.630534	-0.629713	S	7.6059	0.625619	-0.623194	S	7.60708	0.625613	-0.622907																	S	7.69722
																S	7.60116	0.62543	4.86059	S	7.60522	0.626201	4.85953	S	7.60849	0.624322	4.86186	S	7.60709	0.624279	4.86218																	S	7.67039
																S	7.60364	-4.85918	-0.625564	S	7.60841	-4.85971	-0.626253	S	7.60231	-4.85772	-0.622022	S	7.60534	-4.85909	-0.622049																	S	7.67671
																S	7.59928	-4.85713	4.85714	S	7.60153	-4.85703	4.85686	S	7.60325	-4.85773	4.86119	S	7.6024	-4.85809	4.86092																	S	7.67362
																S	-3.4009	0.653627	-0.655212	S	-3.37359	0.622784	-0.621629	S	-3.38413	0.623778	-0.630873	S	-3.37987	0.624869	-0.62807																	S	-3.42723
																S	-3.37302	0.627137	4.87885	S	-3.36815	0.624083	4.86291	S	-3.37024	0.621022	4.86202	S	-3.37316	0.621477	4.86296																	S	-3.40447
																S	-3.37258	-4.87823	-0.629266	S	-3.36994	-4.86351	-0.624617	S	-3.37231	-4.85893	-0.625695	S	-3.37022	-4.86352	-0.624451																	S	-3.40653
																S	-3.36776	-4.85938	4.85894	S	-3.36685	-4.86047	4.85808	S	-3.36411	-4.86218	4.86022	S	-3.36622	-4.863	4.85808																	S	-3.38832
[truncated: 30 more columns]
